# Supplementary material for: Formation of Volatile and Aroma Compounds during the Dehydration of Membrane-Clarified Sugarcane Juice to Non-Centrifugal Sugar
Source: MDPI journal article supplement (doi:10.3390/foods10071561), 2021-07-05
Supplement: s1 [file s1]

# Supplementary Materials

## Formation of Volatile and Aroma Compounds during the Dehydration of Membrane-Clarified Sugarcane Juice to Non-Centrifugal Sugar

Yanjing Ge <sup>1</sup>, Kai Li <sup>1,2,3</sup>, Caifeng Xie <sup>1,2,3</sup>, Yongshi Xu <sup>3,4</sup>, Changrong Shi <sup>1,5,6,\*</sup>, Fangxue Hang <sup>1,2,3,\*</sup> and William O.S. Doherty <sup>5,6</sup>

<sup>1</sup> College of Light Industry and Food Engineering, Guangxi University, Nanning 530004, China;

gyjpapers@163.com (Y.G.); gxlikai@gxu.edu.cn (K.L.); fxc11@163.com (C.X.)

<sup>2</sup> Provincial and Ministerial Collaborative Innovation Center for Sugar Industry, Nanning 530004, China

<sup>3</sup> Engineering Research Center for Sugar Industry and Comprehensive Utilization, Ministry of Education, Nanning 530004, China; xuyongsih@163.com

<sup>4</sup> Guangxi Baiguitang Food Technology Co., Ltd., Guigang 537321, China

<sup>5</sup> Centre for Agriculture and the Bioeconomy, Institute for Future Environments, Queensland University of Technology, Brisbane, QLD 4000, Australia; w.doherty@qut.edu.au

<sup>6</sup> School of Mechanical, Medical and Process Engineering, Science and Engineering Faculty, Queensland University of Technology, Brisbane, QLD 4000, Australia

\* Correspondence: c.shi@qut.edu.au (C.S.); hangfx@163.com (F.H.); Tel.: +61-0731381476 (C.S.);

Tel.: +86-07713231590 (F.H.)

### 1. Experimental Methods

#### 1.1. Extraction and analysis of volatile components

The volatile compounds of each sugar sample were extracted using headspace-solid phase microextraction (HS-SPME). The method was adopted from Huang (2019) with slight modifications. Approximately 0.6 g NaCl was added into a 40 mL headspace vial with 6 mL sugar solution (juice or diluted syrup/sugar), and 6  $\mu$ L of 2-octanol was added as internal standard. The vial was sealed tightly and stabilized in 50 °C water bath for 3 min, the DVB/CAR/PDMS coated (50/30 $\mu$ m; 1 cm) SPME fibre (Supelco, St. Louis, MO, USA) was inserted in the headspace of the vial to absorb the volatile compounds and incubated for 50 min with agitation at 350 rpm. Finally, thermal desorption of the volatile compounds was performed in the GC-MS injection port at 250 °C for 3 min. To avoid contamination, SPME fibre was inserted in the GC injection port and aged for 30 min at 250 °C prior to use.

#### 1.2. Amino acids analysis

An automated amino analyzer (HITACHI L-8900, Hitachi Limited, Tokyo, Japan) was employed to quantify the free amino acids (Shim *et al.*, 2013). Briefly, 1.0 g of sample was dissolved in 10 mL 4% (wt/vol) sulfosalicylic acid, and kept at room temperature for 1 h followed by filtration and centrifugation at 10000 r/min for 15 min. The supernatant was further filter with 0.22  $\mu$ m nylon membrane for analysis. 20  $\mu$ L samples and amino acids standard solution (2 nmol) were injected to Hitachi HPLC Packed column (Ion-exchange resin, 4.6 mm i.d., 60 mm length, 3  $\mu$ m particle size, Tokyo, Japan) with sulfone (SO<sub>3</sub><sup>-</sup>) groups as the active exchange site (amino acids were derivatised through ninhydrin reaction within the column) and detected with a UV-visible detector (Hitach High-Technologies Corp.) at a specific wavelength of 570 nm and 440 nm for proline and hydro proline. The

amino acids content in each sample was calculated by comparing each of the peak area with the standard. The analysis was performed in triplicate.

### 1.3. Sugar analysis

The sugars compositions of the samples were determined using High Performance Ion Chromatography (HPIC) method adopted from Shi et al. (2019) with slightly modifications. Briefly, 1 g of sample was dissolved in 5 mL of ultrapure water, and a further 200 times dilution was applied, and then filtered through 0.45  $\mu\text{m}$  membrane prior to analysis. Dionex 5000 HPLC system equipped with an ED-40 detector were used for the analysis, and CarboPac PA1 column (250 mm  $\times$  4.0 mm i.d., 10- $\mu\text{m}$  particle size, Dionex Co., Osaka, Japan) connected to a CarboPac PA1 (50  $\times$  4.0 mm i.d.) guard column was used as the separation unit. The Dionex GP-40 pump was operated in isocratic mode with 200 mM NaOH at flow rate of 0.6 mL/min and injection volume of 10  $\mu\text{L}$ , the oven was programmed at a constant temperature of 30  $^{\circ}\text{C}$ , the concentration of sugars was calibrated by plotting peak area against concentration for the respective sugar standards. All assays were performed in triplicate.

## 2. Results and discussion

### 2.1. Correlation between volatile compounds and precursors

#### 2.1.1. Correlation with FAA \_ partial least squares regression (PLSR) analysis

Partial least squares regression (PLSR) analysis was applied to discriminate among the contributing amino acids and to determine the correlation between each volatile species and each of the FAA (Figure S2a). The X variables are the 12 volatile species identified within the process, and the Y variables are the 18 free amino acid. The plot contains two ellipses, of which the outer ellipse is the unit-circle and indicates 100% explained variance, and the inner ellipse indicates 50% explained variance. As shown in Figure S2a, seven volatile compounds and all the amino acids were located in between 50% and 100% explained variance, indicating their variances could be well explained by this PLSR Model except alcohols, ketones, phenols, terpene compounds and others located outside the ellipse.

Variables close to each other in the same quadrant of the loadings plot have a high positive correlation. Aldehydes (1), sulfur compounds (3), acids (8), nitrogen heterocyclic compounds (9), oxygen heterocyclic compounds (10) were characterized with positive factor 1 loadings. However, esters (2), hydrocarbons (7) in diagonally opposed quadrants have a tendency to be negative factor 1 loading. All the identified FAA were positively correlated to 1, 3, 8, 9 and 10, while negatively correlated to 2 and 7, indicating the formation of aldehydes, sulfur compounds, acids, oxygen and nitrogen heterocyclic compounds could be tightly correlated to the amino acids, while esters, hydrocarbons formed in the system were not significantly affected by the amino acids.

#### 2.1.2. Correlation with sugars \_ partial least squares regression (PLSR) analysis

To further identify the correlation between sugars and the volatile compounds, partial least squares regression (PLSR) analysis was applied to determine the relationships of each volatile species with the sugars (Figure S2b). The X variables are the 12 volatile compounds identified within the process, and the Y variables are the 3 sugars *i.e.*, glucose, fructose, and sucrose. Similar to the amino acids plot, the outer ellipse is the unit-circle and indicates 100% explained variance and the inner ellipse indicates 50% explained variance. The cross-validation interpretation variance is 95%. As shown in Figure S2b, nine volatile compounds (1, 2, 3, 4, 7, 8, 9, 10, 11) and all the sugars were plotted in between the two ellipses, indicating that all their variances could be well explained by this PLSR Model except ketones (5), phenols (6) and others (12) that located outside the ellipse.

For volatile compounds, aldehydes (1), sulfur compounds (3), acids (8), nitrogen heterocyclic compounds (9), and oxygen heterocyclic compounds (10) were characterized with positive factor 1 loadings, however, esters (2), alcohols (4), hydrocarbons (7), and terpene compounds (11) were in diagonally opposed quadrants and had a tendency to be negative factor 1 loadings. There were significant correlations among 1, 9, 10 in the upper-right quadrant and so as 3 and 8 in the lower-right quadrant. Among the 3 sugars, sucrose was positively correlated to 2, 4, 7 and 11, and negatively correlated to 1, 3, 8, 9, 10, while glucose and fructose had a opposite correlations with the volatiles,

indicating volatiles including aldehydes, sulfur compounds, acids, oxygen and nitrogen heterocyclic compounds were positively associated with glucose and fructose and negatively associated with sucrose, further evidence the MRPs were the dominate aroma-active compounds throughout the whole heating and dehydration process.

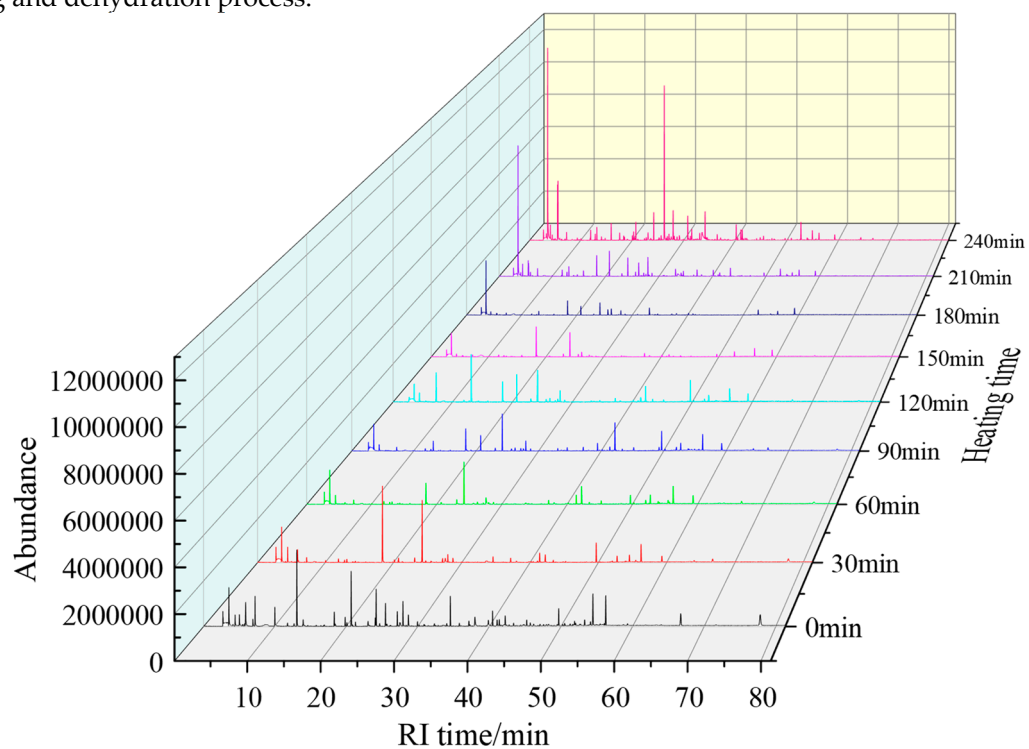

**Figure S1.** 3D waterfall total ion chromatograms of volatile compounds.

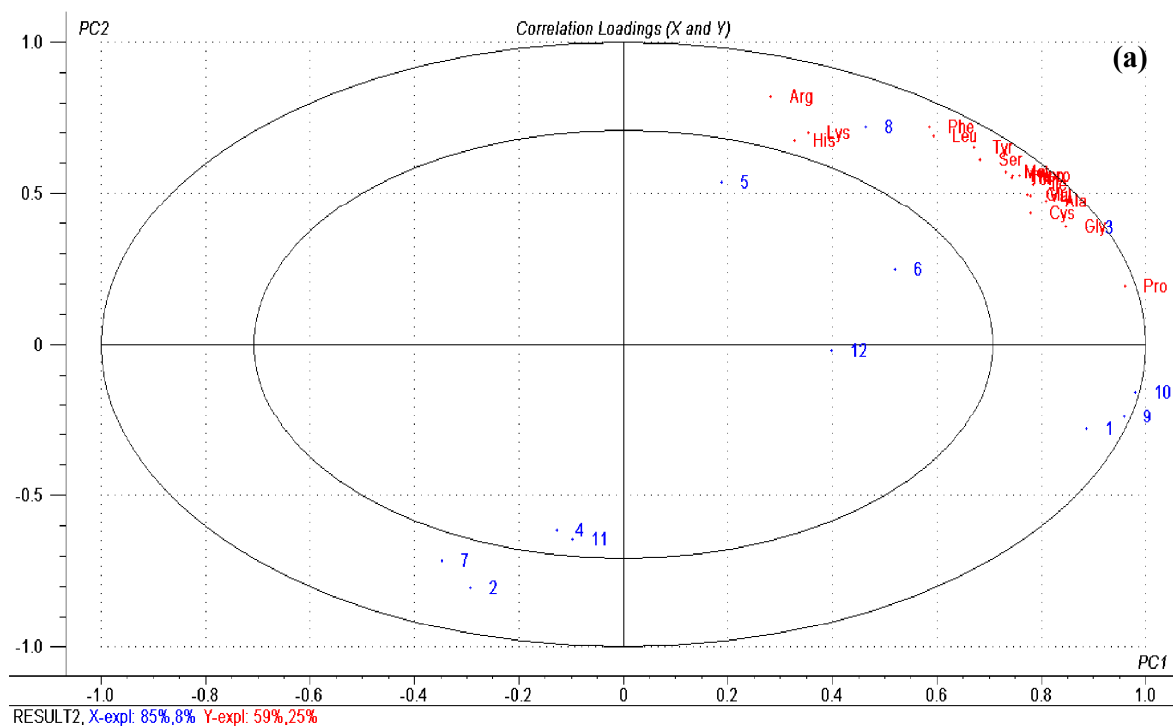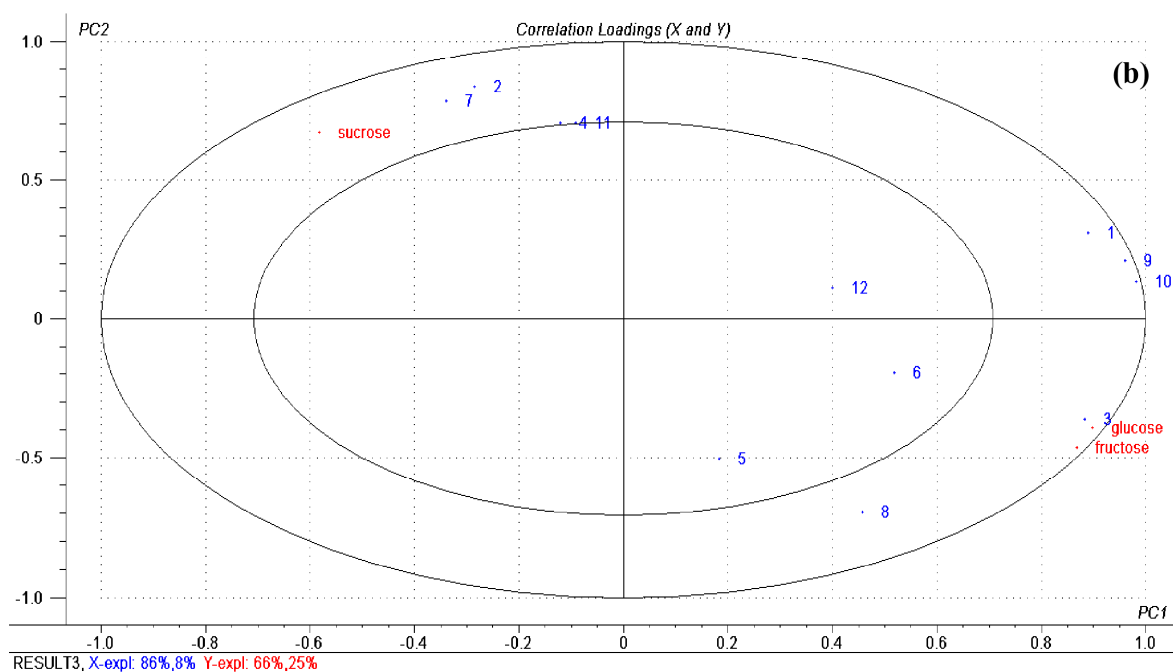

**Figure S2.** Correlation loadings plot of volatile compounds and (a) free amino acid, and (b) sugars during NCS formation process. (Aldehydes-1, esters-2, sulphur compounds-3, alcohols-4, ketones-5, phenols-6, hydrocarbons-7, acids-8, nitrogen compounds-9, oxygen heterocyclic compounds-10, terpene compounds-11, others-12).

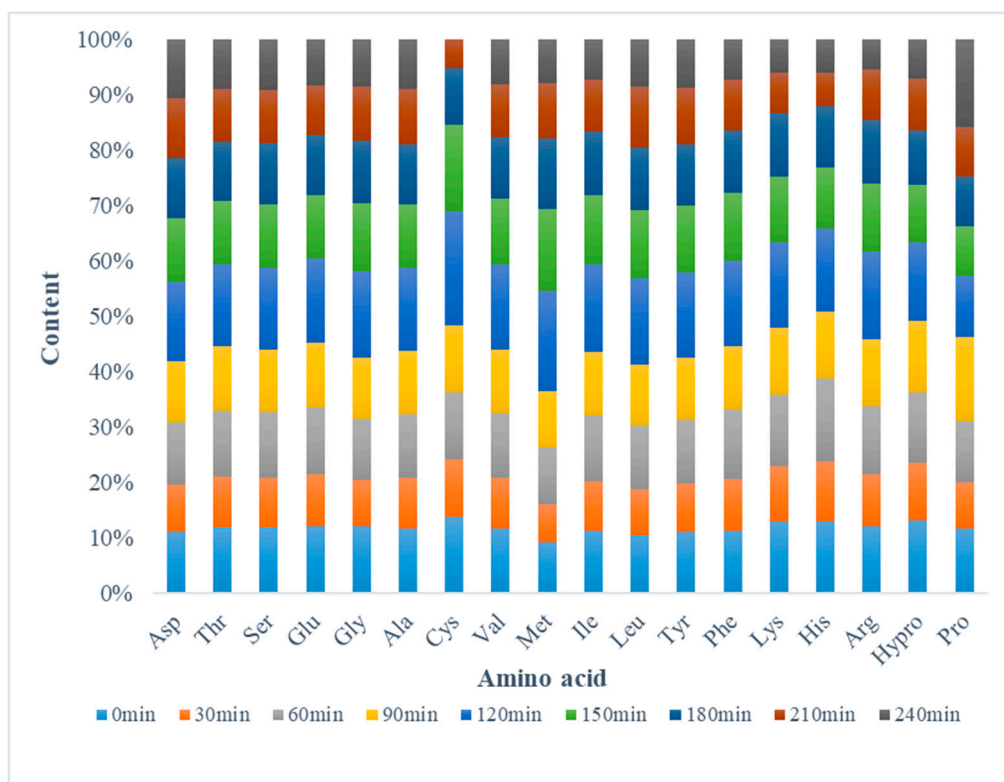

**Figure S3.** Free amino acids percentage variations at different stages during the dehydration of sugarcane juice to NCS products.

**Table S1.** Volatile compounds and the relative concentrations ( $\mu\text{g/g}$ ) identified in the interval samples during the NCS formation process using headspace-solid phase microextraction and gas chromatography–mass spectrometry (HS-SPME and GC-MS).

| NO.       | Compounds                                      | CAS        | RI <sup>A</sup> | Concentration(μg/g) <sup>B</sup> |                        |                        |                        |                         |                         |                         |                        |                         | Odor<br>threshol<br>ds<br>(μg/g<br>) | Odor<br>descriptions             | Identi<br>fication <sup>C</sup> |  |
|-----------|------------------------------------------------|------------|-----------------|----------------------------------|------------------------|------------------------|------------------------|-------------------------|-------------------------|-------------------------|------------------------|-------------------------|--------------------------------------|----------------------------------|---------------------------------|--|
|           |                                                |            |                 | Heating time (min)               |                        |                        |                        |                         |                         |                         |                        |                         |                                      |                                  |                                 |  |
|           |                                                |            |                 | 0                                | 30                     | 60                     | 90                     | 120                     | 150                     | 180                     | 210                    | 240                     |                                      |                                  |                                 |  |
| Aldehydes |                                                |            |                 |                                  |                        |                        |                        |                         |                         |                         |                        |                         |                                      |                                  |                                 |  |
| 1         | 2-Methyl-butanal                               | 96-17-3    | 910             | 0.30±0.01 <sup>d</sup>           | ND                     | ND                     | ND                     | ND                      | 0.41±0.02 <sup>d</sup>  | 0.85±0.02 <sup>c</sup>  | 4.9±0.02 <sup>b</sup>  | 12.07±0.14 <sup>a</sup> | 0.0008                               | Chocolate                        | RI, MS                          |  |
| 2         | 3-Methyl-butanal                               | 590-86-3   | 913             | 0.31±0.01 <sup>c</sup>           | 0.08±0.00 <sup>c</sup> | 0.11±0.00 <sup>c</sup> | 0.10±0.01 <sup>c</sup> | 0.14±0.03 <sup>c</sup>  | 0.32±0.00 <sup>c</sup>  | 0.61±0.09 <sup>c</sup>  | 4.58±0.90 <sup>b</sup> | 14.42±0.85 <sup>a</sup> | 0.00025                              | Bready odor                      | RI, MS                          |  |
| 3         | Pentanal                                       | 110-62-3   | 974             | 2.03±0.05                        | ND                     | ND                     | ND                     | ND                      | ND                      | ND                      | ND                     | ND                      | 0.008                                | Special aroma                    | RI, MS                          |  |
| 4         | Hexanal                                        | 66-25-1    | 1087            | 8.04±0.09 <sup>a</sup>           | 0.40±0.00 <sup>c</sup> | ND                     | ND                     | ND                      | ND                      | ND                      | 0.66±0.02 <sup>b</sup> | 0.61±0.02 <sup>b</sup>  | 0.21                                 | Grassy                           | RI, MS                          |  |
| 5         | Heptanal                                       | 111-71-7   | 1199            | 1.63±0.11 <sup>a</sup>           | 0.19±0.01 <sup>e</sup> | 0.20±0.01 <sup>e</sup> | ND                     | 0.30±0.02 <sup>d</sup>  | ND                      | ND                      | 0.58±0.03 <sup>c</sup> | 1.29±0.02 <sup>b</sup>  | 0.01                                 | Fruity                           | RI, MS                          |  |
| 6         | (E)-2-hexenal                                  | 6728-26-3  | 1233            | 0.14±0.01 <sup>a</sup>           | 0.10±0.02 <sup>b</sup> | ND                     | ND                     | ND                      | ND                      | ND                      | ND                     | ND                      | 0.04                                 | Leaf aroma                       | RI, MS                          |  |
| 7         | Octanal                                        | 124-13-0   | 1295            | 0.75±0.03 <sup>c</sup>           | ND                     | 0.26±0.02 <sup>e</sup> | ND                     | 0.35±0.02 <sup>d</sup>  | ND                      | ND                      | 0.84±0.05 <sup>b</sup> | 1.29±0.07 <sup>a</sup>  | 0.0001                               | Orange, honey                    | RI, MS                          |  |
| 8         | Nonanal                                        | 124-19-6   | 1394            | 1.98±0.04 <sup>c</sup>           | 0.97±0.16 <sup>f</sup> | 1.42±0.06 <sup>d</sup> | 1.23±0.04 <sup>e</sup> | 1.26±0.09 <sup>de</sup> | 1.42±0.05 <sup>d</sup>  | 1.39±0.15 <sup>de</sup> | 3.81±0.09 <sup>a</sup> | 3.26±0.05 <sup>b</sup>  | 0.0035                               | Sweet orange, peanut flavor      | RI, MS                          |  |
| 9         | (E, E)-2,4-Heptadienal                         | 4313-03-5  | 1495            | 1.58±0.01 <sup>a</sup>           | 0.26±0.00 <sup>b</sup> | ND                     | ND                     | ND                      | ND                      | ND                      | ND                     | ND                      | -                                    | -                                | RI, MS                          |  |
| 10        | Benzaldehyde                                   | 100-52-7   | 1523            | 3.50±0.07 <sup>a</sup>           | 1.18±0.02 <sup>c</sup> | ND                     | ND                     | ND                      | 0.50±0.01 <sup>d</sup>  | ND                      | ND                     | 1.41±0.02 <sup>b</sup>  | 0.3                                  | Almond flavor                    | RI, MS                          |  |
| 11        | 2,6,6-Trimethyl-1-cyclohexene-1-carboxaldehyde | 432-25-7   | 1615            | 0.30±0.02                        | ND                     | ND                     | ND                     | ND                      | ND                      | ND                      | ND                     | ND                      | -                                    | Cool, fruity and delicate flavor | RI, MS                          |  |
| 12        | (E, E)-2,4-Nonadienal                          | 5910-87-2  | 1696            | 1.18±0.63 <sup>a</sup>           | 0.16±0.02 <sup>b</sup> | ND                     | ND                     | ND                      | ND                      | ND                      | ND                     | ND                      | 0.00006                              | -                                | RI, MS                          |  |
| 13        | (E, E)-2,4-Decadienal                          | 25152-84-5 | 1804            | 1.28±0.07                        | ND                     | ND                     | ND                     | ND                      | ND                      | ND                      | ND                     | ND                      | 0.00005                              | Chicken oil flavor               | RI, MS                          |  |
| 14        | Decanal                                        | 112-31-2   | 1497            | ND                               | 1.00±0.02 <sup>f</sup> | 1.72±0.08 <sup>c</sup> | 1.29±0.06 <sup>d</sup> | 1.16±0.03 <sup>e</sup>  | 1.20±0.07 <sup>de</sup> | 0.89±0.04 <sup>g</sup>  | 1.87±0.02 <sup>b</sup> | 2.42±0.10 <sup>a</sup>  | 0.005                                | Sweetness, floral                | RI, MS                          |  |
| 15        | Benzene acetaldehyde                           | 122-78-1   | 1640            | ND                               | 0.66±0.01 <sup>c</sup> | ND                     | ND                     | ND                      | ND                      | ND                      | 5.47±0.11 <sup>a</sup> | 3.47±0.14 <sup>b</sup>  | 0.009                                | Sweet odor                       | RI, MS                          |  |

|                         |                                               |              |      |                        |                        |                        |                        |                        |                        |                         |                         |                         |         |                                    |        |
|-------------------------|-----------------------------------------------|--------------|------|------------------------|------------------------|------------------------|------------------------|------------------------|------------------------|-------------------------|-------------------------|-------------------------|---------|------------------------------------|--------|
| 16                      | 2-Methyl-propanal                             | 78-84-2      | 816  | ND                      | ND                      | 3.55±0.09               | 0.0007  | Fresh aldehydic odor               | RI, MS |
| 17                      | Methional                                     | 3268-49-3    | 1457 | ND                      | ND                      | 0.38±0.02               | 0.00004 | Bready odor                        | RI, MS |
| 18                      | Alpha-ethylidene-benzene acetaldehyde         | 4411-89-6    | 1923 | ND                      | ND                      | 0.62±0.02               | -       | Powdery and cocoa odor             | RI, MS |
| 19                      | 3-Ethyl-benzaldehyde                          | 34246-54-3   | 1701 | ND                      | ND                      | 0.51±0.00               | -       | Bitter almond odor                 | RI, MS |
| <b>Esters</b>           |                                               |              |      |                        |                        |                        |                        |                        |                        |                         |                         |                         |         |                                    |        |
| 20                      | Ethyl acetate                                 | 141-78-6     | 886  | 2.67±0.08 <sup>a</sup> | ND                     | ND                     | ND                     | ND                     | ND                     | ND                      | ND                      | 0.36±0.01 <sup>b</sup>  | 0.1     | Etherial, fruity and rum-like odor | RI, MS |
| 21                      | Formic acid, octyl ester                      | 112-32-3     | 1554 | 1.31±0.01              | ND                     | ND                     | ND                     | ND                     | ND                     | ND                      | ND                      | ND                      | -       | Fruity odor                        | RI, MS |
| 22                      | 2,2,4-Trimethyl-1,3-pentanedioaldiisobutyrate | 6846-50-0    | 1869 | 5.60±0.09 <sup>b</sup> | 4.45±0.16 <sup>d</sup> | 4.08±0.08 <sup>e</sup> | 7.21±0.05 <sup>a</sup> | 4.70±0.02 <sup>c</sup> | ND                     | ND                      | ND                      | 1.00±0.09 <sup>f</sup>  | -       | -                                  | RI, MS |
| 23                      | Octadecanoic acid, methyl ester               | 112-39-0     | 2249 | 0.24±0.01 <sup>b</sup> | ND                     | ND                     | 0.60±0.02 <sup>a</sup> | ND                     | ND                     | ND                      | ND                      | ND                      | -       | Waxy, fruity                       | RI, MS |
| 24                      | Octadecanoic acid, ethyl ester                | 628-97-7     | 2251 | 0.68±0.05 <sup>b</sup> | ND                     | ND                     | 1.16±0.05 <sup>a</sup> | ND                     | ND                     | ND                      | ND                      | 0.29±0.02 <sup>c</sup>  | -       | Creamy odor                        | RI, MS |
| 25                      | Dibutyl phthalate                             | 84-74-2      | 2680 | 5.14±0.03              | ND                     | ND                     | ND                     | ND                     | ND                     | ND                      | ND                      | ND                      | -       | Faint odor                         | RI, MS |
| 26                      | 2-Ethylhexyl ester benzoic acid               | 5444-75-7    | 2161 | ND                     | ND                     | 1.35±0.10 <sup>b</sup> | ND                     | 1.80±0.02 <sup>a</sup> | ND                     | ND                      | ND                      | ND                      | -       | -                                  | RI, MS |
| 27                      | Phthalic acid, isobutyl octyl ester           | 1000309-04-5 | -    | ND                     | ND                     | ND                     | 2.20±0.14              | ND                     | ND                     | ND                      | ND                      | ND                      | -       | -                                  | MS     |
| 28                      | Methyl salicylate                             | 119-36-8     | 1769 | ND                      | ND                      | 0.23±0.02               | 0.06    | Minty odor                         | RI, MS |
| 29                      | 2-Furanmethanolacetate                        | 623-17-6     | 1535 | ND                      | ND                      | 1.15±0.03               | -       | Banana-like odor                   | RI, MS |
| <b>Sulfur compounds</b> |                                               |              |      |                        |                        |                        |                        |                        |                        |                         |                         |                         |         |                                    |        |
| 30                      | Dimethyl sulfide                              | 75-18-3      | 753  | 5.11±0.20 <sup>e</sup> | 5.38±0.22 <sup>e</sup> | 4.98±0.11 <sup>e</sup> | 3.91±0.14 <sup>f</sup> | 3.16±0.17 <sup>g</sup> | 6.70±0.12 <sup>d</sup> | 25.40±0.20 <sup>c</sup> | 46.15±0.71 <sup>b</sup> | 50.49±0.54 <sup>a</sup> | 0.002   | Stink                              | MS     |
| 31                      | Dimethyl Sulfoxide                            | 67-68-5      | 1578 | 0.13±0.03 <sup>d</sup> | 0.11±0.01 <sup>d</sup> | 0.07±0.01 <sup>d</sup> | 0.07±0.01 <sup>d</sup> | 0.06±0.01 <sup>d</sup> | 0.08±0.01 <sup>d</sup> | 0.72±0.09 <sup>b</sup>  | 0.58±0.02 <sup>c</sup>  | 0.94±0.05 <sup>a</sup>  | -       | Bitterness                         | RI, MS |
| <b>Alcohols</b>         |                                               |              |      |                        |                        |                        |                        |                        |                        |                         |                         |                         |         |                                    |        |
| 32                      | Ethanol                                       | 64-17-5      | 928  | 5.23±0.12 <sup>a</sup> | 2.58±0.07 <sup>b</sup> | ND                     | ND                     | ND                     | ND                     | ND                      | 1.74±0.02 <sup>c</sup>  | ND                      | 2900    | Wine, pungent, spicy taste         | RI, MS |

|                |                                                              |            |      |                        |                        |                         |                        |                        |                        |                         |                         |                        |            |                                                        |        |
|----------------|--------------------------------------------------------------|------------|------|------------------------|------------------------|-------------------------|------------------------|------------------------|------------------------|-------------------------|-------------------------|------------------------|------------|--------------------------------------------------------|--------|
| 33             | 2-Heptanol                                                   | 543-49-7   | 1325 | 2.43±0.24 <sup>a</sup> | 0.25±0.00 <sup>b</sup> | ND                      | ND                     | ND                     | ND                     | ND                      | ND                      | ND                     | 0.1        | Unpleasant special smell                               | RI, MS |
| 34             | 1-Hexanol                                                    | 111-27-3   | 1356 | 1.49±0.04              | ND                     | ND                      | ND                     | ND                     | ND                     | ND                      | ND                      | ND                     | 0.2        | Waxy odor                                              | RI, MS |
| 35             | 1-Octen-3-ol                                                 | 3391-86-4  | 1450 | 5.79±0.10 <sup>a</sup> | 0.32±0.02 <sup>b</sup> | ND                      | ND                     | ND                     | ND                     | ND                      | ND                      | ND                     | 0.002      | Earthy odor                                            | RI, MS |
| 36             | 2-Ethyl-1-hexanol                                            | 104-76-7   | 1487 | 3.97±0.12 <sup>a</sup> | 0.45±0.03 <sup>e</sup> | 0.33±0.03 <sup>f</sup>  | 0.65±0.01 <sup>d</sup> | 0.47±0.07 <sup>e</sup> | 0.35±0.01 <sup>f</sup> | ND                      | 1.10±0.08 <sup>c</sup>  | 1.79±0.05 <sup>b</sup> | -          | Green scent                                            | RI, MS |
| 37             | 2-Nonanol                                                    | 628-99-9   | 1516 | 0.30±0.01              | ND                     | ND                      | ND                     | ND                     | ND                     | ND                      | ND                      | ND                     | 0.28       | Waxy, green, creamy, orange, citrus, fruity            | RI, MS |
| 38             | Cis-1-methyl-4-(1-methylethyl)-2-cyclohexen-1-ol             | 29803-82-5 | 1598 | 0.30±0.01              | ND                     | ND                      | ND                     | ND                     | ND                     | ND                      | ND                      | ND                     | -          | -                                                      | RI, MS |
| 39             | 4-Isopropyl-1-methylcyclohex-2-enol                          | 29803-82-5 | 1560 | 0.30±0.00              | ND                     | ND                      | ND                     | ND                     | ND                     | ND                      | ND                      | ND                     | -          | -                                                      | RI, MS |
| 40             | Menthol                                                      | 89-78-1    | 1634 | 0.20±0.00              | ND                     | ND                      | ND                     | ND                     | ND                     | ND                      | ND                      | ND                     | 1          | Mint aroma                                             | RI, MS |
| 41             | 1-Nonanol                                                    | 143-08-8   | 1652 | 0.63±0.02              | ND                     | ND                      | ND                     | ND                     | ND                     | ND                      | ND                      | ND                     | 0.002      | -                                                      | RI, MS |
| 42             | Benzyl alcohol                                               | 100-51-6   | 1867 | ND                     | ND                     | ND                      | ND                     | ND                     | ND                     | 0.23±0.04               | ND                      | ND                     | 5.5        | Aromatic                                               | RI, MS |
| 43             | 1-Octanol                                                    | 111-87-5   | 1553 | ND                     | 0.11±0.02 <sup>c</sup> | ND                      | ND                     | ND                     | ND                     | ND                      | 0.38±0.05 <sup>b</sup>  | 0.43±0.05 <sup>a</sup> | 0.054      | Rose fragrance                                         | RI, MS |
| 44             | Cedrol                                                       | 77-53-2    | 2105 | 0.67±0.03 <sup>a</sup> | ND                     | 0.34±0.02 <sup>c</sup>  | 0.67±0.04 <sup>a</sup> | 0.41±0.02 <sup>b</sup> | ND                     | ND                      | ND                      | ND                     | -          | Spicy                                                  | RI, MS |
| <b>Ketones</b> |                                                              |            |      |                        |                        |                         |                        |                        |                        |                         |                         |                        |            |                                                        |        |
| 45             | 2-Heptanone                                                  | 110-43-0   | 1198 | 0.49±0.00 <sup>a</sup> | ND                     | ND                      | ND                     | ND                     | ND                     | ND                      | 0.24±0.01 <sup>b</sup>  | 0.16±0.00 <sup>c</sup> | 0.68       | Pear-like aroma                                        | RI, MS |
| 46             | 3-Octanone                                                   | 106-68-3   | 1263 | 0.33±0.03              | ND                     | ND                      | ND                     | ND                     | ND                     | ND                      | ND                      | ND                     | 1          | Lavender-type fragrance                                | RI, MS |
| 47             | 2-Octanone                                                   | 111-13-7   | 1292 | 4.07±0.12 <sup>f</sup> | 4.35±0.14 <sup>e</sup> | 4.51±0.25 <sup>e</sup>  | 5.30±0.27 <sup>d</sup> | 5.44±0.14 <sup>d</sup> | 7.39±0.16 <sup>c</sup> | 10.80±0.10 <sup>b</sup> | 11.70±0.08 <sup>a</sup> | 1.47±0.04 <sup>s</sup> | 0.05       | Immature apple scent                                   | RI, MS |
| 48             | 2-Nonanone                                                   | 821-55-6   | 1391 | 0.30±0.01              | ND                     | ND                      | ND                     | ND                     | ND                     | ND                      | ND                      | ND                     | 0.05       | Fruity, sweet, waxy, soapy, green, coconut, and creamy | RI, MS |
| 49             | 3-Nonen-2-one                                                | 14309-57-0 | 1511 | 0.30±0.02 <sup>c</sup> | ND                     | 0.10±0.01 <sup>d</sup>  | ND                     | ND                     | ND                     | ND                      | 0.71±0.10 <sup>b</sup>  | 1.44±0.11 <sup>a</sup> | -          | -                                                      | RI, MS |
| 50             | (E)-1-(2,6,6-trimethyl-1,3-cyclohexadien-1-yl)-2-buten-1-one | 23726-93-4 | 1812 | 0.25±0.01 <sup>e</sup> | 0.26±0.02 <sup>e</sup> | 0.32±0.00 <sup>de</sup> | 0.36±0.00 <sup>d</sup> | ND                     | 0.70±0.01 <sup>c</sup> | ND                      | 3.23±0.03 <sup>b</sup>  | 4.67±0.13 <sup>a</sup> | 0.00000495 | -                                                      | RI, MS |



|                     |                                                                       |              |      |                        |                         |                         |                         |                         |                         |                         |                         |                        |         |                          |        |
|---------------------|-----------------------------------------------------------------------|--------------|------|------------------------|-------------------------|-------------------------|-------------------------|-------------------------|-------------------------|-------------------------|-------------------------|------------------------|---------|--------------------------|--------|
| 51                  | (E)-6,10-dimethyl-5,9-undecadien-2-one                                | 3796-70-1    | 1846 | 1.72±0.06 <sup>c</sup> | 1.70±0.10 <sup>c</sup>  | 1.88±0.05 <sup>b</sup>  | 1.69±0.08 <sup>c</sup>  | 1.20±0.10 <sup>d</sup>  | 0.94±0.06 <sup>e</sup>  | 1.01±0.10 <sup>e</sup>  | 3.04±0.08 <sup>a</sup>  | ND                     | 0.01    | Floral                   | RI, MS |
| 52                  | Beta-ionone                                                           | 79-77-6      | 1930 | 0.27±0.01              | ND                      | ND                     | 0.00567 | Cypress, raspberry aroma | RI, MS |
| 53                  | 2,6-Bis(1,1-dimethylethyl)-4-hydroxy-4-methyl-2,5-cyclohexadien-1-one | 1000401-12-0 | 2088 | 2.16±0.05 <sup>d</sup> | 2.56±0.21 <sup>c</sup>  | 1.94±0.09 <sup>e</sup>  | 4.53±0.10 <sup>b</sup>  | 10.66±0.17 <sup>a</sup> | ND                      | ND                      | ND                      | 0.60±0.04 <sup>f</sup> | -       | -                        | RI, MS |
| 54                  | 6-Methyl-5-hepten-2-one                                               | 110-93-0     | 1343 | ND                     | 0.27±0.01 <sup>d</sup>  | 0.43±0.03 <sup>b</sup>  | ND                      | ND                      | 0.33±0.01 <sup>c</sup>  | ND                      | 1.25±0.07 <sup>a</sup>  | ND                     | -       | Fruity, fresh fragrance  | RI, MS |
| 55                  | 2-Pentadecanone                                                       | 2345-28-0    | 2009 | ND                     | ND                      | ND                      | 0.34±0.01               | ND                      | ND                      | ND                      | ND                      | ND                     | -       | -                        | RI, MS |
| 56                  | 2-Nonen-4-one                                                         | 32064-72-5   | 1480 | ND                     | ND                      | ND                      | ND                      | ND                      | ND                      | ND                      | 0.48±0.02 <sup>b</sup>  | 1.21±0.02 <sup>a</sup> | -       | -                        | RI, MS |
| 57                  | Cyclopent-4-ene-1,3-dione                                             | 1000411-44-6 | 1585 | ND                     | ND                      | ND                      | ND                      | ND                      | ND                      | ND                      | 0.45±0.02 <sup>b</sup>  | 1.57±0.07 <sup>a</sup> | -       | -                        | RI, MS |
| 58                  | 4-Hydroxy-3methylacetophenone                                         | 876-02-8     | 1996 | ND                     | ND                      | ND                      | ND                      | ND                      | ND                      | ND                      | ND                      | 0.27±0.02              | -       | -                        | RI, MS |
| <b>Phenols</b>      |                                                                       |              |      |                        |                         |                         |                         |                         |                         |                         |                         |                        |         |                          |        |
| 59                  | Butylated hydroxytoluene                                              | 128-37-0     | 1901 | 0.95±0.05 <sup>c</sup> | 0.76±0.01 <sup>d</sup>  | 0.63±0.02 <sup>e</sup>  | 0.97±0.01 <sup>c</sup>  | 1.87±0.10 <sup>a</sup>  | 0.63±0.01 <sup>e</sup>  | 1.31±0.05 <sup>b</sup>  | 1.32±0.01 <sup>b</sup>  | ND                     | -       | -                        | RI, MS |
| 60                  | 3-Allyl-6-methoxyphenol                                               | 501-19-9     | 2154 | 0.10±0.00              | ND                      | ND                     | -       | -                        | RI, MS |
| 61                  | 2,4-Di-tert-butylphenol                                               | 96-76-4      | 2307 | 6.70±0.06 <sup>a</sup> | 2.76±0.10 <sup>d</sup>  | 3.65±0.20 <sup>c</sup>  | 4.40±0.06 <sup>b</sup>  | 4.32±0.32 <sup>b</sup>  | 3.30±0.21 <sup>c</sup>  | 2.80±0.30 <sup>d</sup>  | 4.43±0.24 <sup>b</sup>  | 2.65±0.23 <sup>d</sup> | -       | -                        | RI, MS |
| 62                  | 2-Methoxy-4-vinylphenol                                               | 7786-61-0    | 2184 | ND                     | 1.05±0.13 <sup>e</sup>  | 2.00±0.05 <sup>d</sup>  | 2.29±0.13 <sup>c</sup>  | 1.88±0.04 <sup>d</sup>  | 1.96±0.03 <sup>d</sup>  | 3.81±0.13 <sup>b</sup>  | 3.81±0.20 <sup>b</sup>  | 5.92±0.08 <sup>a</sup> | 0.01    | Woody odor               | RI, MS |
| 63                  | Eugenol                                                               | 97-53-0      | 2155 | ND                     | 1.07±0.06               | ND                      | ND                      | ND                      | ND                      | ND                      | ND                      | ND                     | 0.001   | Spicy odor               | RI, MS |
| <b>Hydrocarbons</b> |                                                                       |              |      |                        |                         |                         |                         |                         |                         |                         |                         |                        |         |                          |        |
| 64                  | Beta-Phellandrene                                                     | 555-10-2     | 1214 | 0.32±0.02              | ND                      | ND                     | 0.036   | Minty scent              | RI, MS |
| 65                  | 3-Ethyl-2-methyl-1,3-hexadiene                                        | 61142-36-7   | 1417 | 2.29±0.16 <sup>a</sup> | 0.30±0.01 <sup>b</sup>  | 0.11±0.02 <sup>c</sup>  | ND                      | ND                      | ND                      | ND                      | ND                      | ND                     | -       | -                        | RI, MS |
| 66                  | Methylene chloride                                                    | 75-09-2      | 922  | 0.34±0.43 <sup>a</sup> | 0.07±0.02 <sup>ab</sup> | 0.11±0.01 <sup>ab</sup> | 0.10±0.01 <sup>ab</sup> | 0.15±0.01 <sup>ab</sup> | 0.11±0.00 <sup>ab</sup> | 0.11±0.02 <sup>ab</sup> | 0.12±0.02 <sup>ab</sup> | ND                     | 24      | Pungent smell            | RI, MS |
| 67                  | Pentadecane                                                           | 629-62-9     | 1491 | 0.21±0.01 <sup>b</sup> | 0.09±0.01 <sup>d</sup>  | 0.26±0.01 <sup>a</sup>  | 0.20±0.01 <sup>b</sup>  | 0.12±0.02 <sup>c</sup>  | ND                      | ND                      | 0.25±0.03 <sup>a</sup>  | ND                     | -       | -                        | RI, MS |
| 68                  | Hexadecane                                                            | 544-76-3     | 1589 | 0.36±0.01 <sup>a</sup> | 0.15±0.00 <sup>d</sup>  | 0.30±0.01 <sup>c</sup>  | 0.11±0.00 <sup>e</sup>  | 0.30±0.01 <sup>b</sup>  | ND                      | ND                      | ND                      | ND                     | -       | -                        | RI, MS |

|                                        |                                                              |            |      |                        |                         |                         |                         |                        |                        |                        |                        |                        |      |                     |                   |
|----------------------------------------|--------------------------------------------------------------|------------|------|------------------------|-------------------------|-------------------------|-------------------------|------------------------|------------------------|------------------------|------------------------|------------------------|------|---------------------|-------------------|
| 69                                     | Heptadecane                                                  | 629-78-7   | 1686 | 0.42±0.01 <sup>a</sup> | ND                      | 0.13±0.01 <sup>b</sup>  | ND                      | ND                     | ND                     | ND                     | ND                     | ND                     | -    | -                   | RI, MS            |
| 70                                     | Nonadecane                                                   | 629-92-5   | 1884 | 0.68±0.02 <sup>a</sup> | ND                      | ND                      | 0.37±0.02 <sup>b</sup>  | ND                     | ND                     | ND                     | ND                     | ND                     | -    | -                   | RI, MS            |
| 71                                     | Cyclododecane                                                | 294-62-2   | 1955 | 1.47±0.02 <sup>a</sup> | 0.99±0.01 <sup>cd</sup> | 1.20±0.05 <sup>ab</sup> | 0.86±0.63 <sup>cd</sup> | 0.63±0.03 <sup>c</sup> | ND                     | ND                     | ND                     | ND                     | -    | -                   | RI, MS            |
| 72                                     | Eicosane                                                     | 112-95-8   | 1983 | 0.61±0.03              | ND                      | ND                      | ND                      | ND                     | ND                     | ND                     | ND                     | ND                     | -    | -                   | RI, MS            |
| 73                                     | Nonyl-cyclopropane                                           | 74663-85-7 | 1954 | ND                     | ND                      | ND                      | ND                      | ND                     | ND                     | ND                     | ND                     | 0.03±0.02              | -    | -                   | RI, MS            |
| <b>Acids</b>                           |                                                              |            |      |                        |                         |                         |                         |                        |                        |                        |                        |                        | -    |                     |                   |
| 74                                     | 2-Propenoic acid                                             | 79-10-7    | 1630 | ND                     | ND                      | ND                      | 0.14±0.01 <sup>f</sup>  | 0.36±0.04 <sup>e</sup> | 1.58±0.01 <sup>d</sup> | 6.06±0.06 <sup>c</sup> | 4.15±0.09 <sup>a</sup> | 2.54±0.05 <sup>b</sup> | -    | Pungent smell       | RI, MS            |
| 75                                     | Acetic acid                                                  | 64-19-7    | 1453 | ND                     | ND                      | 0.17±0.02 <sup>g</sup>  | 0.64±0.03 <sup>f</sup>  | 0.90±0.09 <sup>e</sup> | 1.81±0.08 <sup>d</sup> | 4.63±0.05 <sup>a</sup> | 2.60±0.17 <sup>b</sup> | 2.00±0.04 <sup>c</sup> | 120  | Acidic odor         | RI, MS            |
| 76                                     | 3-Hydroxy-2,2,4-trimethylpentylester 2-methyl-propanoic acid | 77-68-9    | 1860 | ND                     | ND                      | 0.12±0.01               | ND                      | ND                     | ND                     | ND                     | ND                     | ND                     | -    | -                   | RI, MS            |
| 77                                     | Nonanoic acid                                                | 112-05-0   | 2150 | ND                     | ND                      | ND                      | 0.32±0.01               | ND                     | ND                     | ND                     | ND                     | ND                     | 1.5  | Special smell       | RI, MS            |
| 78                                     | 3-Chloro-2-methoxypyridine-5-boronic acid                    | 942-43-8   | 1474 | ND                     | ND                      | ND                      | ND                      | ND                     | ND                     | ND                     | ND                     | 0.97±0.08              | -    | -                   | RI, MS            |
| <b>Nitrogen heterocyclic compounds</b> |                                                              |            |      |                        |                         |                         |                         |                        |                        |                        |                        |                        |      |                     |                   |
| 79                                     | 3-Methyl-2,5-piperazinedione                                 | 6062-46-0  | 2022 | ND                     | ND                      | ND                      | ND                      | ND                     | ND                     | ND                     | ND                     | 0.52±0.00              | -    | -                   | RI, MS            |
| 80                                     | 1-(1H-pyrrol-2-yl)-ethanone                                  | 932-16-1   | 1962 | ND                     | ND                      | ND                      | ND                      | ND                     | ND                     | ND                     | 0.54±0.05 <sup>b</sup> | 1.44±0.09 <sup>a</sup> | -    | Coffee, fruit aroma | RI, MS            |
| 81                                     | 2,6-Dimethyl-pyrazine                                        | 108-50-9   | 1334 | ND                     | ND                      | ND                      | ND                      | ND                     | ND                     | ND                     | 0.58±0.02 <sup>b</sup> | 3.55±0.08 <sup>a</sup> | 10   | Roasted odor        | nutty RI, MS      |
| 82                                     | Methyl-pyrazine                                              | 109-08-0   | 1276 | ND                     | ND                      | ND                      | ND                      | ND                     | ND                     | ND                     | ND                     | 3.00±0.13              | 1    | Nutty odor          | chocolate RI, MS  |
| 83                                     | 2,3-Dimethyl-pyrazine                                        | 5910-89-4  | 1351 | ND                     | ND                      | ND                      | ND                      | ND                     | ND                     | ND                     | MD                     | 0.66±0.03              | 0.1  | Nutty peanut odor   | and butter RI, MS |
| 84                                     | 2-Ethyl-5-methyl-pyrazine                                    | 13360-64-0 | 1393 | ND                     | ND                      | ND                      | ND                      | ND                     | ND                     | ND                     | ND                     | 0.46±0.03              | 1    | Nutty roasted odor  | and coffee RI, MS |
| 85                                     | 3-Ethyl-2,5-dimethyl-pyrazine                                | 13360-65-1 | 1445 | ND                     | ND                      | ND                      | ND                      | ND                     | ND                     | ND                     | ND                     | 0.53±0.02              | 0.05 | Nutty odor          | roasted RI, MS    |

[illegible]

|                        |                                                |              |      |                        |                        |                        |                        |                         |                        |                        |                        |                        |       |                                                 |        |
|------------------------|------------------------------------------------|--------------|------|------------------------|------------------------|------------------------|------------------------|-------------------------|------------------------|------------------------|------------------------|------------------------|-------|-------------------------------------------------|--------|
| 104                    | D-Limonene                                     | 5989-27-5    | 1205 | 0.43±0.01 <sup>a</sup> | 0.22±0.00 <sup>d</sup> | 0.25±0.01 <sup>c</sup> | 0.29±0.01 <sup>b</sup> | ND                      | 0.19±0.01 <sup>e</sup> | ND                     | 0.21±0.01 <sup>e</sup> | 0.20±0.01 <sup>e</sup> | 0.034 | Sweet and orange citrus, fragrance like flowers | RI, MS |
| 105                    | 1-Methyl-4-(1-methylethyl)-1,3-cyclohexadiene  | 99-86-5      | 1189 | 0.08±0.00              | ND                     | ND                     | ND                     | ND                      | ND                     | ND                     | ND                     | ND                     | -     | Citrus and lemon aroma                          | RI, MS |
| <b>Other compounds</b> |                                                |              |      |                        |                        |                        |                        |                         |                        |                        |                        |                        |       |                                                 |        |
| 106                    | 1,2,3,4-Tetrahydro-1,6,8-trimethyl-naphthalene | 30316-36-0   | 1475 | ND                     | ND                     | ND                     | ND                     | ND                      | ND                     | ND                     | ND                     | 0.88±0.02              | -     | -                                               | RI, MS |
| 107                    | 2-(2-Butenyl)-1,3,5-trimethyl-benzene          | 63435-25-6   | 1514 | ND                     | ND                     | ND                     | ND                     | ND                      | ND                     | ND                     | ND                     | 0.28±0.01              | -     | -                                               | RI, MS |
| 108                    | 1,2,3,4-Tetrahydro-1,1,6-Trimethyl-naphthalene | 475-03-6     | 1660 | ND                     | ND                     | ND                     | ND                     | ND                      | ND                     | ND                     | 0.40±0.03 <sup>b</sup> | 0.80±0.04 <sup>a</sup> | -     | -                                               | RI, MS |
| 109                    | 2,2',5,5'-Tetramethyl-1,1'-biphenyl            | 3075-84-1    |      | ND                     | ND                     | 0.49±0.06 <sup>b</sup> | 0.25±0.06 <sup>c</sup> | ND                      | ND                     | ND                     | 0.71±0.02 <sup>a</sup> | ND                     | -     | -                                               | MS     |
| 110                    | (E)-1,2,3-Trimethyl-4-propenyl-naphthalene     | 26137-53-1   | 2177 | 4.16±0.05 <sup>a</sup> | ND                     | 0.45±0.03 <sup>d</sup> | 0.83±0.02 <sup>b</sup> | 0.38±0.01 <sup>de</sup> | ND                     | 0.36±0.05 <sup>c</sup> | ND                     | 0.36±0.05 <sup>e</sup> | -     | -                                               | RI, MS |
| 111                    | Methoxy-phenyl-oxime                           | 1000222-86-6 | 1754 | ND                     | 0.83±0.01 <sup>e</sup> | 1.38±0.09 <sup>d</sup> | 0.64±0.06 <sup>f</sup> | ND                      | 1.84±0.05 <sup>c</sup> | 2.47±0.10 <sup>a</sup> | 2.28±0.11 <sup>b</sup> | 0.88±0.05 <sup>e</sup> | -     | -                                               | RI, MS |

Each value is the mean of triplicate determinations ± standard deviation and values with different letter within the same row are significantly different ( $p < 0.05$ ). ND not detected. <sup>a</sup> Retention indices relative to n-alkanes (C8-C40) on a polar DB-Wax column; <sup>b</sup> Integration of the peak was performed by choosing the characteristic ion (m/z) for the respective compounds with the highest matching index (>80%); as to avoid possible interference by other compounds. The concentrations are given in terms of equivalents to the internal standard 2-octanol; <sup>c</sup> Identification based on retention index (RI), NIST 14 MS library (MS).

## References

1. Huang, S., 2019, A preliminary study on the identification of aroma components of brown sugar and the traceability, master thesis, Guangxi University, Nanning.
2. Shi, C.; Rackemann, D.W.; Moghaddam, L.; Wei, B.; Li, K.; Lu, H.; Xie, C.; Hang, F.; Doherty, W.O.S. Ceramic membrane filtration of factory sugarcane juice: Effect of pretreatment on permeate flux, juice quality and fouling. *J Food Eng.*, **2019**, 243, 101-113. <https://doi.org/10.1016/j.jfoodeng.2018.09.012>.
3. Shim, Y.S.; Yoon, W.J.; Ha, J.; Seo, D.; Lee, K.W.; Lee, W.Y.; Kwon, K.; Kang, T.S.; Lee, J.H.; Kim, H.J.; et al. Method validation of 16 types of structural amino acids using an automated amino acid analyzer. *Food Sci. Biotechnol.*, **2013**, 22(6), 1567–1571. <https://doi.org/10.1007/s10068-013-0252-0>.
